# Supplementary material
Source: PubMed Central journal article supplement (PMC8026709)

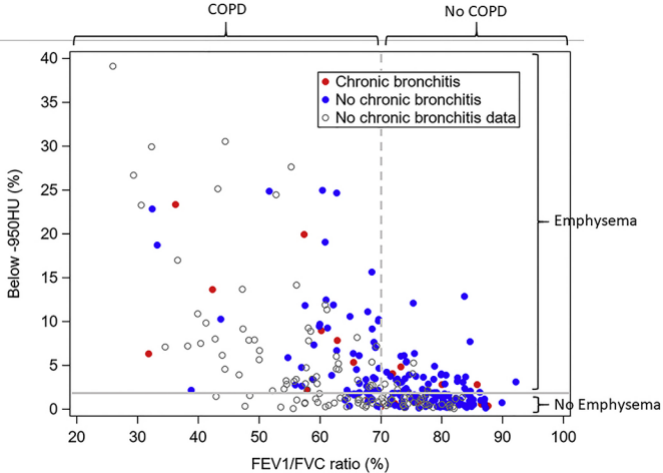

Supplement: NIHMS1673845-supplement-Supplementary_materials_1.pdf [file NIHMS1673845-supplement-Supplementary_materials_1.pdf]
